# Supplementary material for: Genome-wide analysis of the basic Helix-Loop-Helix (bHLH) transcription factor family in maize
Source: PubMed Central journal article supplement (PMC6192367; doi:10.1186/s12870-018-1441-z), 2018-10-16

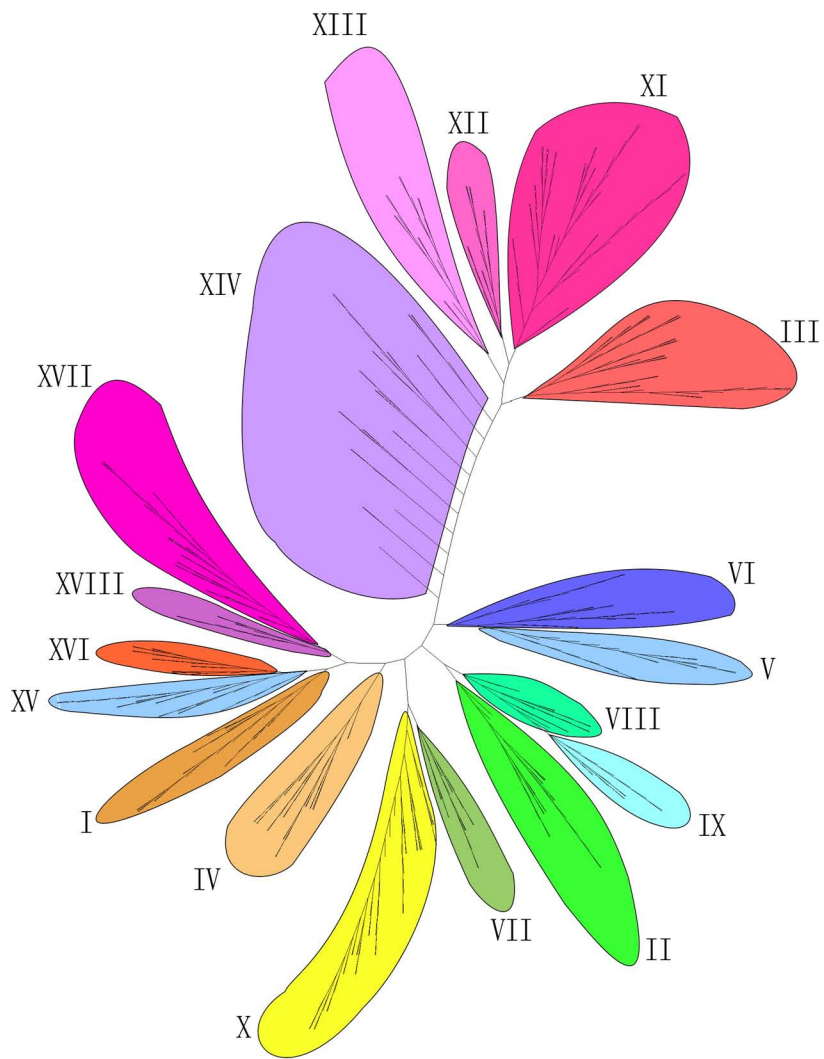

Supplement: 12870_2018_1441_MOESM4_ESM.pdf [file 12870_2018_1441_MOESM4_ESM.pdf]
